# Supplementary material for: Transcriptome Analysis of Immune Receptor Activation and Energy Metabolism Reduction as the Underlying Mechanisms in Interleukin-6-Induced Skeletal Muscle Atrophy
Source: Front Immunol. 2021 Sep 6;12:730070. doi: 10.3389/fimmu.2021.730070 (PMC8450567; doi:10.3389/fimmu.2021.730070)
Supplement: Supplementary file 4 [file Table_4.xlsx]

## Sheet: Sheet1
gene1	gene2	score
Trp53	Chek1	995
Nfkb2	Bcl3	987
Trp53	Bard1	986
E2f2	Ccna2	984
Trp53	Bax	982
Trp53	Ccna2	975
Trp53	Tigar	967
Trp53	Brca1	965
Trp53	Ccng1	959
Trp53	Bak1	958
Trp53	Apaf1	947
Trp53	Pmaip1	946
E2f2	Ccne1	941
Ugcg	Cers6	938
Trp53	Rbbp8	937
Trp53	Exo1	937
Trp53	Casp8	935
Smpd1	Cers6	934
Cers6	Cerk	934
Trp53	Cdk1	921
Trp53	Gtse1	920
Esrra	Atp5b	920
Casp8	Ar	920
Plpp2	Cers6	918
Flt3	Cebpa	917
Gba	Cers6	915
Trp53	Rfc5	913
Trp53	Sod2	910
Trp53	Rfc3	909
Trp53	Birc5	907
Trp53	Gapdh	904
Galc	Cers6	901
Zc3h8	Pou2f2	900
Ube2c	Cebpb	900
S100b	Nfkb2	900
Pou2f2	Ints2	900
Hsp90b1	Ar	891
Trp53	Casp6	872
E2f2	Cdk1	869
E2f2	Acacb	868
Cers6	Cd3d	868
Stat4	Ptpn2	862
Trp53	Plk1	859
Wdhd1	Mcm5	858
E2f2	Cdc6	858
Trp53	Ccnb1	857
Wdhd1	Mcm3	853
Trp53	Cdc25c	830
Trp53	Tgfb1	822
Wdhd1	Chtf18	815
Trp53	Cd82	811
Ciita	Cebpb	811
Trp53	Ptk2b	810
Thra	Pik3r5	800
Slc11a1	Irf8	797
Trp53	Ccne1	796
Wt1	Trp53	791
Mcm3	E2f2	788
E2f2	Ccnf	788
Trp53	Skp2	784
Hmgb2	Cdk1	775
Txn1	Trp53	774
Trp53	Hpgds	772
Trp53	Nlrc4	751
Trp53	Sesn2	750
Gapdh	Ar	749
E2f2	Ccnb1	747
Trp53	Smyd1	746
Wdhd1	Dscc1	743
Trp53	Plk4	737
Trp53	Muc1	736
Myog	Mstn	733
Ikzf1	Flt3	733
Trp53	Mdc1	732
Top2a	Hmgb2	732
Hmgb2	Ccna2	728
E2f2	Ccnb2	728
Trp53	Epas1	724
Hpgds	Ar	724
Cebpa	Cdk1	724
Trp53	Timp3	723
Ddit3	Bak1	723
Txn1	Nfkb2	720
Fhl2	Ar	720
Wdhd1	Gins2	719
Wdhd1	Cdc6	716
Trp53	Ppif	716
Trp53	Ccnb2	712
Ciart	Bhlhe41	710
Irf8	Cybb	709
Trp53	Sirt3	707
Hmgb2	Ccnb1	704
E2f2	Ccng1	703
Wdhd1	Top2a	702
Mxd3	Cdc20	702
Prc1	Hmgb2	699
Traf1	Nfkb2	694
Trp53	Insr	690
Hmgb2	Cdc20	689
Trp53	Mgst1	687
Trp53	Cdkn3	685
Ccne1	Ar	685
Trp53	Car9	683
Trp53	Cdc20	678
Irf8	C1qb	676
Trp53	Fancd2	675
Tlr9	Irf8	673
Sgpl1	Cers6	673
Wdhd1	Pole2	669
Tyms	Trp53	669
Notch2	Heyl	668
Mcm3	Hmgb2	665
Hsp90b1	Ddit3	665
Hmgb2	Arhgap11a	665
Nr3c2	Hsd11b2	658
E2f2	Apaf1	654
Klk1	Ar	653
Trp53	Bid	652
Wdhd1	Rad51	649
Ncapg	Hmgb2	644
Wdhd1	Ncapg	637
Trp53	Lgals3	637
Stat4	Ifnar1	637
Hmgb2	Cks2	637
Trp53	Rps27a	634
Hmgb2	Cdca8	633
Trp53	Pycard	631
Trp53	Hsp90b1	631
Trp53	S100b	630
Trp53	Phb	630
Syk	Nfkb2	628
Sptlc2	Cers6	628
Hmgb2	Birc5	628
Uhrf1	Hmgb2	627
Trp53	Decr1	626
Trp53	Dusp5	625
Tnfrsf1a	Nfkb2	623
Trp53	Melk	621
Trp53	Hmmr	620
Hmgb2	Ccnb2	615
Trp53	Rnf144b	614
Trp53	Dusp9	614
Melk	Hmgb2	613
Tcf23	Eml1	612
Zwilch	Hmgb2	611
Tyms	E2f2	611
Ly86	Irf8	610
Trp53	Rad51	609
Trp53	Cd48	608
Gsn	Ar	605
Kif22	Hmgb2	604
Tcf23	Slc11a1	603
Trp53	Flt3	602
Trp53	Tnnt1	601
Trp53	Tnnt2	600
Trp53	Ptprc	600
Flt3	Bcl11a	600
Ar	Aes	600
Traf2	Nfkb2	599
Trp53	Rps6ka1	596
Usp2	Nr3c2	595
Ptprc	Irf8	595
Nr3c2	Decr1	595
Notch2	Id2	595
Wdhd1	Rfc5	594
Tradd	Nfkb2	594
Hmgb2	Bub1b	593
Wdhd1	Ncaph	587
Syk	Hmgb2	587
Irf8	Csf1r	587
Trp53	Prkca	586
Trp53	Slc2a4	585
Trp53	Sirt5	585
Ptges2	Cebpb	584
Tnfsf11	Id2	583
Trp53	Cycs	581
Rxrg	Abca1	580
Nfkb2	Casp8	580
Hmgb2	Cdca5	580
Wdhd1	Espl1	579
Irf8	Cd86	579
Ybx2	Top2a	578
Trp53	Recql4	578
Wdhd1	Mcm6	577
Hmgb2	Asf1b	574
Txnip	Mlxipl	573
Lyz2	Cebpa	571
Hmgb2	Cep55	571
Nuf2	Hmgb2	570
Smyd1	Myog	569
Trerf1	Fam60a	568
Myog	Gapdh	566
Ube2c	Hmgb2	565
Sirt5	Foxn3	565
Kif20a	Hmgb2	565
Epas1	Bhlhe41	564
Plk4	Hmgb2	561
Mcm5	Hmgb2	561
Wdhd1	Recql4	558
Trp53	Dclk1	558
Myo5c	Cux2	557
Vdr	Syk	555
Ptprc	Ikzf1	555
Hmgn2	Hmgb2	555
Wdhd1	Uhrf1	554
Spc25	Hmgb2	554
Myog	Ckm	554
Cers6	Atp5f1	554
Slc30a7	E2f2	553
Hmgb2	2810417H13Rik	552
Ncaph	Hmgb2	550
Etv4	Brca1	549
Wdhd1	Chek1	548
Tgfb1	Fosl2	548
Insr	Cers6	548
Trp53	Baz1a	547
Mxd3	Kif18b	547
Wdhd1	Exo1	546
Hmgb2	Bub1	546
Pck1	Mlxipl	545
Wdhd1	Asf1b	544
Rxrg	Prkcg	543
Rxrg	Prkca	543
Tgfb1	Id2	542
Gata2	Flt3	542
Trp53	Tnfrsf1a	541
Hmmr	Ar	541
Gapdh	Ddit3	541
E2f2	Cdc25c	541
Notch2	Gata2	538
Hmgb2	Ckap2	538
Vdr	Insr	537
Rps6ka4	Cebpa	535
Qrsl1	Gata2	535
Glb1l2	Cebpa	535
Trp53	Abcb4	534
Stat4	Cxcl10	534
Irf8	Ctss	534
Hmmr	Hmgb2	534
Ybx2	Cdk1	533
Insr	Ar	532
Trp53	Htatip2	530
Plk1	Hmgb2	529
Ncapg2	Hmgb2	529
Wdhd1	Tyms	528
Insr	Cebpb	527
Wdhd1	Cdca5	526
Wdhd1	Aspm	525
Myog	Myl4	525
Rps6ka1	Cebpb	524
Trp53	Ccnf	523
Trp53	BC026585	522
Tlr7	Irf8	522
Kif20b	Hmgb2	522
Trp53	Top2a	520
Sgol2a	Hmgb2	520
Nr3c2	Gapdh	520
Tlr13	Nfkb2	519
Stat4	Il4ra	518
Myog	Myl1	517
Irf8	Cd48	516
Dcaf6	Ar	515
Cux2	Aspm	515
Trp53	Rtn4ip1	514
Pdlim5	Id2	513
Klf11	Gapdh	513
Mxd3	Ckap2l	512
Wdhd1	Bub1b	510
Trp53	Fhl2	510
Trp53	Plekhf1	507
Trp53	Ppp1r3a	505
Irs1	Id2	505
Wdhd1	Clspn	504
Trp53	Trim8	503
Trp53	Rnasel	503
Irf8	Flt3	503
Wdhd1	Bub1	502
Trp53	Tns1	502
Rfc5	Hmgb2	502
Cdk1	Ar	502
Trp53	Gpnmb	501
Irf8	Il10ra	500
Cebpa	Cd7	500
Trp53	Bcl3	499
Tnmd	Scx	498
Mapk4	Fosl2	498
Id2	Cxcr6	498
Trp53	Notch2	497
Trp53	Bub1	497
Wdhd1	Dtl	495
Trp53	Ptp4a3	495
Myog	Myh1	495
Nfkb2	Itgb2	494
Trp53	Ephb2	492
Prdx4	Ar	492
Irf8	Cxcl10	492
Vcam1	Gata2	491
Trp53inp2	Trp53	491
Ar	Acpp	489
Stat4	Ghr	486
Trp53	Bub1b	485
Trp53	Glipr1	484
Sirt5	Cers6	484
Trp53	Rps6ka2	483
Tcf23	Pcnt	483
Trp53	Cdc6	482
Tcf23	Ros1	481
Tcf23	Espl1	481
Wdhd1	Dlgap5	480
Top2a	Ar	480
Tnnt1	Myog	480
Spic	Laptm5	477
Spib	Flt3	477
Hmgb2	Dscc1	477
Trp53	Syk	476
Thra	Gapdh	476
Gata2	Aldh1a1	476
Thra	Dio2	475
Irf8	Ciita	475
Vdr	Mstn	474
Trp53	Krt8	474
Rps27a	Myog	474
Mcm5	E2f2	473
Id2	Flt3	473
Id2	Epas1	473
Wnt11	Esrra	472
Trp53	Entpd1	471
Trip13	Hmgb2	471
Myog	Ciita	471
Hmgb2	Depdc1a	471
Wdhd1	Ccna2	470
Gapdh	Cebpa	470
Unc93b1	Irf8	468
Trp53	Irs1	468
P4hb	Cebpa	468
Mlxipl	Gpd2	468
Ddit3	Casp8	468
Nfkb2	Lims2	466
Myog	Myh11	466
Trp53	Cdc14a	465
Esrra	Cpt1b	465
Vdr	Top2a	464
Trp53	Sdcbp	464
Trp53	Prkcg	464
Trp53	Lgmn	464
Mstn	Cebpa	464
Mgst1	Gata2	464
Birc5	Ar	463
Trp53	Tlr4	462
Wdhd1	Cdk1	461
Vdac2	Myog	461
Trp53	Gpx3	461
P4hb	Ddit3	461
Nfkb2	Il1r1	461
Mcm6	Hmgb2	461
Gata2	Gapdh	461
Tlr4	Hmgb2	460
Rxrg	Me3	460
Trp53	Cyp2e1	459
Tnfsf11	Spib	459
Zwilch	Wdhd1	457
Spn	Ikzf1	457
Spib	Fcrla	457
Irak4	Hmgb2	456
Ikzf1	Cd48	456
Mxd3	Bub1b	455
Mpeg1	Irf8	455
Mcm6	E2f2	455
Heyl	Dll4	455
Trp53	Sdhc	452
Prkca	Ar	451
Nr3c2	Hgs	451
Trp53	Apoe	450
Tnfrsf1a	Stat4	450
Tlr4	Irf8	450
Sgol1	Mxd3	450
Trp53	Glb1	449
Slc2a4	Cebpa	449
Myog	Chrna1	449
Hmgb2	Cenpe	449
Trp53	Tradd	448
Tnnt1	Ar	448
Nfkb2	Gapdh	448
Lpl	Cebpa	448
Fosl2	Dio2	448
Top2a	Thra	447
Spib	Laptm5	447
Mlxipl	Lpl	447
Id2	Gapdh	447
Mlxipl	Acacb	446
Ly96	Hmgb2	446
Slc2a4	Mlxipl	445
Foxn3	Cdk1	445
Tspo	Tcf23	444
Tnnt2	Ar	444
Tcf23	Has1	444
Prkca	Nfkb2	444
Itgb2	Irf8	443
Gata2	Cd48	443
Trp53	Napsa	442
Trp53	Cox4i1	442
Tnnt2	Myog	442
Tnc	Tcf23	442
Stat4	Il10ra	441
Spib	Lyz2	441
Kif23	Hmgb2	441
Trp53	Ctsb	440
Prkcg	Nfkb2	440
Pira6	Irf8	440
Hmgb2	Ercc6l	440
C330027C09Rik	Ar	440
Wdhd1	Nuf2	439
Tradd	Stat4	439
Syk	Irf8	439
Spic	Lyz2	439
Tyro3	Tcf23	438
Spic	Slc11a1	438
Trp53	Slc19a2	436
Rad51	Hmgb2	436
Tnfsf11	Fosl2	435
Tlr4	Nfkb2	435
Trp53	Dusp2	433
Ptprc	Gata2	433
Hmgb2	Aspm	433
Txlnb	Hivep2	432
Irf8	Cd53	432
Hmgb2	Cdc6	432
Wdhd1	Plk4	431
Sgol1	Hmgb2	431
Rxrg	Me2	430
Runx3	Fancd2	430
Prc1	Mxd3	430
Nckap1l	Irf8	430
Trp53	Fscn1	429
Tmem38a	Pitx2	429
Wdhd1	Ccnb1	428
Trp53	Rmdn1	428
Trp53	Ldha	428
Incenp	Hmgb2	428
Wdhd1	Rfc3	427
Wdhd1	Mms22l	427
Ncaph	Mxd3	427
Decr1	Ar	427
Tnnt1	Thra	426
Cers6	Acot13	426
Cebpa	Cd48	426
Trp53	Csf1r	425
Stat4	Ifnar2	425
Zeb2	Gapdh	424
Trp53	Ppia	424
Trp53	Nrg1	424
Got2	Cebpa	424
Syk	Spib	423
Stat4	Hsp90b1	423
Pld4	Irf8	423
Tnnt2	Thra	422
Tcfl5	Igdcc4	422
Wdhd1	Cdca8	421
Plk1	E2f2	421
Pck1	Cebpa	421
Mxd3	Cdc25c	421
Mlxipl	Insr	421
Irf8	Fcgr3	421
Cers6	Acer3	421
Wt1	Ar	420
Wdhd1	Ncapg2	420
Wdhd1	Cdc20	420
Trp53	Itgb1	420
Trp53	Fut4	420
Trp53	Ctss	420
Tro	Tcf23	420
Rcor2	Prc1	420
Nr3c2	Insr	419
Mxd3	Kif22	419
Wdhd1	Trip13	418
Myog	Myo5c	418
Lyz2	Irf8	418
Hmgb2	Exo1	418
Csf1r	Cebpa	418
Trp53	Traf1	417
Spc24	Mxd3	417
Sgk3	Foxn3	417
Rps6ka4	Foxn3	417
Rps6ka2	Foxn3	417
Rps6ka1	Foxn3	417
Runx3	Pira6	416
Runx3	Gm15448	416
Plk1	Mxd3	416
Pld4	Lyl1	416
Pitx2	Efemp2	416
Nfkb2	Arrb2	416
Irf8	C1qc	416
Irf8	Asah1	416
Gata2	Csf1r	416
Myog	Mb	414
Mxd3	Cdca5	414
Mxd3	Ccnb1	414
Bak1	Ar	414
Zfp827	Pot1b	413
Greb1	Ar	413
Tgfb1	Ar	412
Trp53	Ncam1	411
Trp53	Csk	411
Top2a	Esrra	411
Tcf23	Hadh	411
Rfc3	Hmgb2	411
Myo1g	Irf8	411
Mfn2	Esrra	411
Kifc1	Hmgb2	411
E2f2	Cdc20	411
Wdhd1	Birc5	409
Tnfsf11	Stat4	409
Spib	Slc11a1	409
Plcg2	Irf8	409
Nfkb2	Cxcl10	409
Kif2c	Hmgb2	409
Ybx2	Eif4a1	408
Trp53	Dffa	408
Trp53	Axin2	408
Top2a	Rxrg	408
Top2a	Nr3c2	408
Top2a	Esrrg	408
Notch2	Ikzf1	408
Myog	Myh13	408
Lpl	Ar	408
Trp53	Lyz2	407
Spib	Csf1r	407
Mxd3	Espl1	407
Ms4a6b	Irf8	407
Mlxipl	Irs1	405
Irf8	Cd300c2	405
Trp53	Mcm5	404
Tcfl5	Ckap2	404
Rxrg	Klk1	404
Ripk3	Nfkb2	404
Plk1	Nfkb2	404
Trp53	Tnfsf11	403
Ptprc	Id2	403
Hmgb2	Ckap2l	403
Wsb1	Gata2	402
Irf8	Cyba	402
Gapdh	Etv4	402
Trp53	Cd37	400
Tgif1	Klk1	400
Lyz2	Cebpb	400
Klk1	Cebpa	400
Gapdh	Fosl2	400
Wdhd1	Kif18b	399
Trp53	Pros1	398
Trp53	Prima1	398
Trp53	Prc1	398
Tfec	Klk1	398
Spib	Dlat	398
Parvg	Nfkb2	398
Oxnad1	Gata2	398
Nfkb2	Itgb1	398
Irf8	Ifnar1	398
Thra	Insr	396
Pmaip1	Ddit3	396
Trp53	Clspn	395
Thrsp	Mlxipl	395
Skp2	E2f2	395
Trp53	Pde4b	394
Trp53	Pcnt	394
Wdhd1	Cep55	392
Slc2a4	Myog	392
Ncapg	Mxd3	392
Wt1	Cebpa	391
Trp53	Cd53	391
Tead4	Mob1a	391
Insr	Cebpa	391
Trp53	Mcm3	390
Tead4	Pitpnm3	390
Syk	Fosl2	390
Spib	Cd22	390
Sash3	Irf8	390
Nr3c2	Cybb	390
Notch2	Myog	390
Mlxipl	Clic1	390
Gapdh	Cebpb	390
Rps6ka1	Nfkb2	389
Melk	Id2	389
Ikzf1	Csf1r	389
Hsp90b1	Ahrr	389
Wdhd1	Hmmr	388
Trp53	Cd86	388
Tcf23	Rtn4ip1	388
Mstn	Ar	388
Hgs	Ar	388
Hmgb2	Chek1	387
Gapdh	E2f2	387
Tcf23	Pros1	386
Tcf23	Nrg1	386
Rasd2	Bhlhe41	386
Plk4	Nfkb2	386
Myog	Fsd1l	386
Ms4a4a	Irf8	386
Gnai2	Ar	386
Ddit3	Apaf1	386
Trp53	Cenpe	385
Irf8	Fermt3	385
Irf8	C1qa	385
Tyms	Hmgb2	384
Trp53	Fanca	384
Irf8	Gapdh	383
Trp53	Pthlh	382
Trp53	Il15	382
Nfkb2	Irak4	382
Myo1g	Cux2	382
Mxd3	Kif2c	382
Kif18b	Hmgb2	382
Wnt11	Tbx2	381
Trp53	Traf2	381
Trp53	Dusp10	381
Laptm5	Irf8	381
Uhrf1	Mxd3	380
Spc24	Hmgb2	380
Myog	Mylpf	380
Mxd3	Chtf18	380
Gata2	Bola3	380
Myo1g	Lyl1	379
Mxd3	Hmmr	379
Gapdh	Esrra	379
Bub1	2610305D13Rik	379
Tnn	Stat4	378
Thra	Galk1	378
Skp2	Ar	378
Sirt5	Myog	378
Myog	Myh8	378
Irf8	H2-DMa	378
Cebpa	Baalc	378
Trp53	Mapk4	377
Spib	Ciita	377
Zeb2	Aldh1a1	376
Nfkb2	Eml1	376
Nek2	Hmgb2	376
Mxd3	Ccna2	376
Wdhd1	Skp2	375
Trp53	Abcc3	375
Thra	Lpl	375
Lifr	Fosl2	375
Trp53	Mcm6	374
Trp53	Alpl	374
Mxd3	Clspn	374
Hmgb2	Dbf4	374
Wsb1	Hivep2	373
Wdhd1	Sgol1	373
Vdr	Gapdh	373
Rps6ka1	Fosl2	373
Mxd3	Cdca8	373
Ybx2	Syk	372
Ube2c	Mxd3	372
Trp53	Bmp6	372
Sash3	Lyl1	372
Nfkb2	Itgb5	372
Neil3	Hmgb2	372
Irf8	Inpp5d	372
Trp53	Gusb	371
Tnnc2	Myog	371
Wdhd1	Ercc6l	370
Trp53	Gsn	370
Tlr9	Nfkb2	370
Syk	Ikzf1	370
Rfc5	Nfkb2	370
Irf8	Cd22	370
Insr	Esrra	370
Zbtb16	Gapdh	369
Tyro3	Nfkb2	369
Trp53	Nlrp1a	369
Ranbp1	E2f2	369
Nup93	Hmgb2	369
Nfkb2	Cdk1	369
Tlr4	Stat4	368
Pdia3	Ddit3	368
Hmgb2	Chtf18	368
Wsb1	Gm13212	367
Tcf23	Col11a1	367
Stat4	Ciita	367
Rhoc	Hmgb2	367
Ikzf1	Gapdh	367
Hpgds	Fosl2	367
Gata2	Bmp6	367
Zbtb16	Flt3	366
Trp53	Mstn	366
Spib	Blnk	366
Runx3	Cd48	366
Nfkb2	Bax	366
Rps6ka2	Nfkb2	365
Mxd3	Gins2	365
Rps6ka4	Nfkb2	364
Rfc3	Nfkb2	364
Mxd3	Kif20a	364
Mapk4	Etv4	364
Heyl	Aes	364
Bhlhe41	Aes	364
Trp53	Sgk3	363
Syk	Stat4	363
Myog	Dach2	363
Hmgb2	2700094K13Rik	363
Gata2	Cyb5b	363
Wt1	Gata2	362
Tcf23	Rrbp1	362
Sirt5	E2f2	362
Myog	Myh9	362
Ikzf1	Chpt1	362
Trp53	Tnc	361
Trp53	Hpse	361
Thra	Slc16a2	361
Sgol2a	Mxd3	361
Nrg1	Ar	361
Myog	Chrng	361
Irf8	Blnk	361
Wdhd1	Melk	360
Vcam1	Trp53	360
Trp53	Lrig1	360
Trp53	Ifnar1	360
Trerf1	Hr	360
Stat4	Ptk2b	360
Ska1	Mxd3	360
Lpin1	Klf9	360
Esrra	Acadvl	360
Zbtb16	Lpin1	359
Lyl1	Inpp5d	359
Zbtb16	Hadha	358
Trp53	Cd68	358
Lyl1	Hmha1	358
Lpl	Esrra	358
Hmgb2	Cdc25c	358
Wdfy4	Stat4	357
Txnip	Trp53	357
Trp53	Chga	357
Trerf1	Ccng1	357
Stat4	Lbp	357
Pou2f2	Klk1	357
Osr1	Bub1	357
Mms22l	Hmgb2	357
Mis18bp1	Hmgb2	357
Hmgb2	Cenpu	357
Snrpd1	Hmgb2	356
Ptpn18	Irf8	356
Lyl1	Fermt3	356
Chga	Ar	356
Cebpb	Cdk1	356
Myl4	Gata2	355
Mxd3	Ckap2	355
Zbtb16	Top2a	354
Top2a	E2f2	354
Stat4	Ptpn18	354
Zfp827	Bub1	353
Zfp691	Bub1	353
Zfp30	Bub1	353
Zbtb16	Bub1	353
Trp53	Cfl1	353
Slc2a4	Esrra	353
Runx3	Gapdh	353
Pde4b	Ar	353
Klf9	Bub1	353
Klf12	Bub1	353
Klf11	Bub1	353
Ikzf1	Bub1	353
Hmgb2	Clspn	353
Hivep2	Bub1	353
Gm13212	Bub1	353
Glis3	Bub1	353
E2f2	Cks2	353
Bub1	Bcl11a	353
Tead4	Mapk4	352
Stat4	Flt3	352
Myog	Eya1	352
Irf8	Cxcl16	352
Rxrg	Dhrs7c	351
Wnt11	Pitx2	350
Wdhd1	Dbf4	350
Trp53	Rnf19b	350
Tnni2	Myog	350
Dtl	Cebpb	350
Zbtb16	Eef1a1	349
Trp53	Ptpn2	349
Trp53	Map2k6	349
Trp53	Cxcl10	349
Tcf23	Lipa	349
Slc11a1	Nfkb2	349
Siglech	Irf8	349
Rps6ka1	Ar	349
Pitx2	P2ry2	349
Nr3c2	Cyba	349
Nfkb2	Csf1r	349
Myog	Insr	349
Myh11	Cebpa	349
Wdhd1	Kif22	348
Trp53	Klk1	348
Irf8	Igtp	348
Trp53	Il11	347
Tgfb1	Gata2	347
Notch2	Bhlhe41	347
Ncaph	E2f2	347
Hmgb2	Baz1a	347
Trp53	Dtl	346
Tec	Nfkb2	346
Rbbp8	E2f2	346
Heyl	Fanca	346
Fanca	Bhlhe41	346
Asb4	2610305D13Rik	346
Trp53	Ppp1r1a	345
Trp53	Cib1	345
Prkcg	Ar	345
Irf8	Fcgr2b	345
Wdhd1	Prc1	344
Trp53	Rhoc	344
Stat4	Ptprc	344
Spib	Cd3d	344
Myl1	Gata2	344
Lyl1	Cd7	344
Lyl1	Cd48	344
Trp53	Pgk1	343
Trp53	Acsl1	343
Ncam1	Myog	343
Mapk4	Ddit3	343
Wsb1	Klf9	342
Trp53	Rom1	342
Tnfsf11	Nfkb2	342
Tnfrsf1b	Nfkb2	342
Nap1l1	Hmgb2	342
Ikzf1	Blnk	342
Id2	Csf1r	342
Hmgb2	Hist1h1e	342
Trp53	Pdia3	341
Trp53	Ada	341
Tns1	Fosl2	341
Mxd3	Depdc1b	341
Cers6	Asah1	341
Spib	Ptprc	340
Rhoc	Nfkb2	340
Plk4	Foxn3	340
Plk1	Foxn3	340
Mxd3	Melk	340
Foxn3	Asb12	340
Wdhd1	Mthfd1l	339
Tfec	Mapk4	339
Spib	Jchain	339
Nfkb2	Csk	339
Myoz1	Myog	339
Tspan4	Trp53	338
Trp53	Tnik	338
Trp53	Incenp	338
Nop58	Hmgb2	338
Mxd3	Asf1b	338
Hadha	Esrra	338
Tyms	Tfcp2l1	337
Rasgef1b	Prrx2	337
Vgll3	Tead4	336
Tcf23	Fut4	336
Nfkb2	Flt3	336
Neil3	Mxd3	336
Mstn	Gata2	336
Zfp827	Wsb1	335
Zfp691	Wsb1	335
Zfp30	Wsb1	335
Zbtb16	Wsb1	335
Wsb1	Trp53	335
Wsb1	Osr1	335
Wsb1	Klf12	335
Wsb1	Klf11	335
Wsb1	Ikzf1	335
Wsb1	Glis3	335
Wsb1	Bcl11a	335
Wsb1	2610305D13Rik	335
Mxd3	Kifc1	335
Irf8	Ccr5	335
Heyl	Epas1	335
E2f2	Birc5	335
Wdhd1	Car2	334
Tgfb1	Nr3c2	334
Sirt5	Ar	334
P2ry6	Irf8	334
Wdhd1	Sgol2a	333
Muc1	Ar	333
Fosl2	Bcl3	333
Wdhd1	Gapdh	332
Vsir	Trp53	332
Trp53	Hrk	332
Trp53	Endog	332
Rps6ka2	Fosl2	332
Pthlh	Ar	332
Prrx2	Prdx4	332
Irf8	Clec4a3	332
Hmgb2	Dlgap5	332
Hmgb2	Actr3	332
Tead4	Pitpnc1	331
Rnase6	Irf8	331
Irf8	Chrna1	331
Decr1	Ddit3	331
Trp53	Smpd1	330
Trp53	Pyurf	330
Trp53	Myh11	330
Trp53	Hk2	330
Tnfrsf1a	Ar	330
Tcf23	Galc	330
Ptprc	Myog	330
Plk4	E2f2	330
Itgb5	Hmgb2	330
Itgb2	Hmgb2	330
Itgb1	Hmgb2	330
Irf8	Il15	330
Zbtb16	Acacb	329
Tyro3	Trp53	329
Thra	Hpgds	329
Foxn3	Ccng1	329
Fosl2	Dusp5	329
Sod2	Cers6	328
Sgk3	Nfkb2	328
Rps6ka1	E2f2	328
Prkcg	Foxn3	328
Prkca	Foxn3	328
Hmgb2	C330027C09Rik	328
Chek1	Bhlhe41	328
Trp53	Lgals1	327
Mxd3	Birc5	327
Mmp23	Etv4	327
Foxn3	Ccnb1	327
Esrrg	Acadm	327
Ar	Alpl	327
Trp53	Ank2	326
Rbbp8	Ikzf1	326
Pcsk6	Nfkb2	326
Wdhd1	Decr1	325
Ube2c	Trp53	325
Trp53	Tlr9	325
Trp53	Fmod	325
Trerf1	Gapdh	325
Stat4	Camk2a	325
Trp53	St14	324
Rxrg	Gapdh	324
Hadha	Esrrg	324
Fosl2	Ccng1	324
Zfp827	Hadha	323
Zfp691	Hadha	323
Zfp30	Hadha	323
Tcfl5	Cthrc1	323
Prkca	Fosl2	323
Osr1	Hadha	323
Myog	Atp2a1	323
Klf9	Hadha	323
Klf12	Hadha	323
Klf11	Hadha	323
Irf8	Cd68	323
Ikzf1	Hadha	323
Hivep2	Hadha	323
Hadha	Gm13212	323
Hadha	Glis3	323
Hadha	Bcl11a	323
Hadha	2610305D13Rik	323
Wdhd1	Kif23	322
Txn1	Ar	322
Thra	Hadha	322
Pole2	Hmgb2	322
Melk	Fosl2	322
Tubb5	Nfkb2	321
Trp53	Dld	321
Stat4	Ptpn7	321
Spic	Csf1r	321
Nr3c2	Lpl	321
Mapk4	Gata2	321
Ikzf1	Arhgap30	321
Tfec	Csf1r	320
Osr1	Flt3	320
Zeb2	Tgfb1	319
Wdhd1	Ccnb2	319
Trp53	Pdlim5	319
Tcf23	Ngfrap1	319
Spib	Siglech	319
Ptpn18	Lyl1	319
Pdlim5	Nfkb2	319
Myo1f	Irf8	319
Irf8	Hmha1	319
Il15	Id2	319
Fmn1	Cux2	319
Wdhd1	Fancd2	318
Trp53	Aldh1a1	318
Trerf1	Rps6ka1	318
Sod2	Foxn3	318
Skp2	Hmgb2	318
Kcnk13	Foxn3	318
Irf8	Cd84	318
Insr	Id2	318
Insr	Gata2	318
Id2	Ccne1	318
Trp53	Cybb	317
Trerf1	Irs1	317
Sod2	Ddit3	317
Ptprc	Nfkb2	317
Ptprc	Cebpa	317
Plekha7	E2f2	317
Pitx2	Gapdh	317
Nr3c2	Ncf1	317
Myog	Irs1	317
Mlxipl	Cyp2e1	317
Lyl1	Arhgap30	317
Krt8	Ar	317
Insr	Ddit3	317
Id2	Bmp6	317
Foxn3	Ccnb2	317
Fosl2	Dusp2	317
Fosl2	Dusp15	317
Fosl2	Dusp10	317
E2f2	Bak1	317
Cd48	Ar	317
Brca1	Ar	317
Trp53	Trf	316
Skp2	Foxn3	316
Sirt3	Foxn3	316
Pptc7	Hivep2	316
E2f2	Dbf4	316
Trp53	Pdk2	315
Traf2	Ddit3	315
Nr3c2	Apoe	315
Myh9	Cux2	315
Myh8	Cux2	315
Myh7b	Cux2	315
Myh1	Cux2	315
Myh13	Cux2	315
Myh11	Cux2	315
Mlxipl	Abca1	315
Irs1	Cers6	315
Ddit3	Atp2a2	315
Trp53	Kera	314
Trp53	Eif4a1	314
Tlr7	Nfkb2	314
Nfkb2	Insr	314
Nfkb2	Acacb	314
Eif4a1	E2f2	314
Trp53	Spn	313
Trp53	Gpr132	313
Stat4	Retnla	313
Sgk3	Nr3c2	313
Nckap1l	Lyl1	313
Wdhd1	Kif20b	312
Tead4	Obscn	312
Spc25	Mxd3	312
Foxn3	Ankrd66	312
Fosl2	Dusp9	312
Trp53	Dnajb5	311
Trp53	Ccr5	311
Tnmd	Tcf23	311
Tjp3	Id2	311
Rxrg	Lpl	311
Rps6ka2	E2f2	311
Foxn3	Ccna2	311
Spic	Ptprc	310
Pitx2	Acvr2b	310
Pdia3	Ar	310
Nfkb2	Hsp90b1	310
Fosl2	Ccna2	310
Zeb2	Muc1	309
Wsb1	E2f2	309
Trp53	Myh1	309
Trp53	Cxcl16	309
Tnfsf11	Ar	309
Tlr8	Irf8	309
Tcf23	Rbbp8	309
Myot	Myog	309
Myog	Hpgds	309
Mxd3	Mfsd7a	309
Irs1	Cebpa	309
Ddit3	Apoe	309
Cux2	Abcd2	309
Trp53	Ankrd1	308
Rxrg	Hadha	308
Ar	Abca1	308
Uhrf1	E2f2	307
Trp53	Sfrp1	307
Tnc	Nfkb2	307
Tlr5	Nfkb2	307
Thra	Csf1r	307
Spn	Id2	307
Nfkb2	Arhgef6	307
Irs1	Ar	307
Il11	Gata2	307
Zfp30	Kank3	306
Zbtb16	Notch2	306
Vdr	Hadha	306
Trp53	P4hb	306
Tnc	Etv4	306
Thrsp	Thra	306
Nr3c2	Hadha	306
Hadha	Ar	306
Esrra	Cox5b	306
Zfp691	Rbm47	305
Txn1	Ddit3	305
Tcap	Myog	305
Stat4	Ripk3	305
Rhoh	Ikzf1	305
Rcan2	Heyl	304
Rcan2	Bhlhe41	304
Pdlim4	Nfkb2	304
Nfkb2	Mvp	304
Irs1	Ddit3	304
Gapdh	Esrrg	304
Wdhd1	Cenpe	303
Tnnt2	Gata2	303
Mxd3	Incenp	303
Kif23	E2f2	303
Gata2	Acvr2b	303
Fosl2	Ccnf	303
Esrra	Acadm	303
E2f2	Atp5a1	303
Zfp30	Lpin1	302
Trp53	Tpbg	302
Trp53	Dusp23	302
Syk	Spic	302
Stat4	Prkcg	302
Stat4	Prkca	302
Mxd3	Cdc6	302
Irf8	Csf2ra	302
Hmgb2	Brca1	302
Heyl	Fancd2	302
Fancd2	Bhlhe41	302
Zfp827	Acacb	301
Trp53	Immt	301
Nfkb2	Mapk4	301
Irf8	Iigp1	301
Tubb5	Hmgb2	300
Trp53	Inha	300
Trp53	Cd22	300
Tnfrsf13b	Nfkb2	300
Tead4	Egflam	300
Tcf23	Ptpn4	300
Ranbp1	Hmgb2	300
Qrsl1	Lyl1	300
Irf8	Havcr2	300
Irf8	Cxcr3	300
Wdhd1	Incenp	299
Trp53	Dusp15	299
Tnnt1	Gata2	299
Tead4	Amot	299
Syk	Ar	299
Runx3	Myh11	299
Mxd3	Dscc1	299
Lyl1	Ly86	299
Klf12	Asb12	299
Irf8	Cd3d	299
Hmgb2	Espl1	299
Csk	Ar	299
Ar	Acvr2b	299
Trp53	Pkm	298
Trp53	Gpi1	298
Stat4	Csf1r	298
Ptgr2	Gm13212	298
Mapk4	Hivep2	298
Esrra	Cox4i1	298
Trp53	Ldb3	297
Spic	C1qa	297
Bmp6	Ar	297
Zfp827	Lpin2	296
Zfp827	Lpin1	296
Zfp691	Lpin2	296
Zfp691	Lpin1	296
Zfp30	Lpin2	296
Zbtb16	Lpin2	296
Trp53	Mb	296
Trp53	Gm35498	296
Trp53	Fsd2	296
Trp53	A630001G21Rik	296
Stat4	Mapk4	296
Pck1	Nr3c2	296
Osr1	Lpin2	296
Osr1	Lpin1	296
Notch2	Bcl11a	296
Mlxipl	Cpt2	296
Lyl1	Flt3	296
Lpin2	Klf9	296
Lpin2	Klf12	296
Lpin2	Klf11	296
Lpin2	Ikzf1	296
Lpin2	Hivep2	296
Lpin2	Gm13212	296
Lpin2	Glis3	296
Lpin2	Bcl11a	296
Lpin2	2610305D13Rik	296
Lpin1	Klf12	296
Lpin1	Klf11	296
Lpin1	Ikzf1	296
Lpin1	Hivep2	296
Lpin1	Gm13212	296
Lpin1	Glis3	296
Lpin1	Bcl11a	296
Lpin1	2610305D13Rik	296
Hivep2	Actr3b	296
Fbxl19	Bcl11a	296
E2f2	Chek1	296
Zfp30	Fbxl19	295
Trp53	Hpn	295
Trp53	Camk2a	295
Stat4	Ephb2	295
Ripk3	Gata2	295
Prkcg	Fosl2	295
P4hb	Ar	295
Myog	Chrnd	295
Mlxipl	Decr1	295
Map2k6	Ddit3	295
Fosl2	Csf1r	295
Etv4	Epas1	295
Trp53	Igfbp4	294
Thra	Rasd2	294
Ncf1	Irf8	294
Cdc25c	Ar	294
Sox7	Adgrf5	293
Rxrg	Rps6ka2	293
Rxrg	Rps6ka1	293
Penk	Fosl2	293
Irf8	Cx3cr1	293
Heyl	Asb18	293
Cdh23	Ar	293
Zbtb16	Tnnt2	292
Wdhd1	Kif2c	292
Trp53	Got2	292
Spic	Cd86	292
Siglech	Id2	292
Hpgds	Ddit3	292
Cux2	Axin2	292
Trp53	Pfkfb1	291
Pvalb	Cux2	291
Nfkb2	Ndufv1	291
Nfkb2	Acsl1	291
Axin2	Ar	291
Wdhd1	2810417H13Rik	290
Vegfb	Trp53	290
Unc13d	Trp53	290
Tubb2a	Nfkb2	290
Tuba8	Nfkb2	290
Tuba1c	Nfkb2	290
Trp53	Rnh1	290
Trp53	Myo7a	290
Trp53	Fcgr2b	290
Trp53	Ank	290
Tcfl5	Cd48	290
Tcf23	Lrig1	290
Tcf23	Dse	290
Tcf23	Acot11	290
Ska1	Hmgb2	290
Scx	Gapdh	290
Rxrg	Abca6	290
Runx3	Flt3	290
Nfkb2	Mcm5	290
Nfkb2	Cerk	290
Mlxipl	Got2	290
Jph1	Bhlhe41	290
Insr	Esrrg	290
Gpd2	Cebpa	290
Ddit3	Birc5	290
Zfp691	Acacb	289
Zfp30	Acacb	289
Zeb2	Cdh11	289
Ybx2	Gar1	289
Thra	Cdh23	289
Spib	Myo1g	289
Osr1	Acacb	289
Klf9	Acacb	289
Klf12	Acacb	289
Klf11	Acacb	289
Ikzf1	Acacb	289
Hivep2	Acacb	289
Gm13212	Acacb	289
Glis3	Acacb	289
Bcl11a	Acacb	289
Acacb	2610305D13Rik	289
Trp53	Rps6ka4	288
Trp53	Myl4	288
Thra	Greb1	288
Tcea3	Osr1	288
Spic	Flt3	288
Runx3	Ptprc	288
Ripk3	Fosl2	288
Nfkb2	Ccng1	288
E2f2	Agl	288
Cd22	Bcl11a	288
Uhrf1	Trp53	287
Trp53	Tro	287
Trp53	Mmp24	287
Syce2	Hmgb2	287
Sirt3	Myog	287
Pitpnm3	Klf12	287
Nfkb2	Dclk1	287
Myo1g	Ikzf1	287
Hmgb2	Actr3b	287
Foxn3	Ccnf	287
Fosl2	Cdk1	287
Zbtb16	Cd48	286
Wdhd1	Kif15	286
Trp53	Hgs	286
Tnnc2	Cux2	286
Sirt5	Esrra	286
Rps6ka1	Myog	286
Nfkb2	Dhrs7c	286
Myog	Itm2a	286
Mlxipl	Hk2	286
Lyl1	Lrmp	286
Zfp827	Pitpnc1	285
Wdhd1	Mdc1	285
Trp53	Eml1	285
Tlr9	Spib	285
Spic	Cd48	285
Sirt3	Esrra	285
Sgk3	Ar	285
Rxrg	Insr	285
Nfkb2	Mcm3	285
Fcrla	Bcl11a	285
Ybx2	Sun2	284
Tec	Stat4	284
Stat4	Csk	284
Ppm1e	Hivep2	284
Mxd3	Cenpe	284
Hsd17b12	Gm13212	284
Ccng1	Ar	284
Trp53	Espl1	283
Rps6ka2	Myog	283
Melk	Etv4	283
Greb1	Esrrg	283
Wt1	Thra	282
Trp53	Ghr	282
Tmem106a	Snai3	282
Tlr4	Cebpb	282
Tcf23	Ostn	282
Nfkb2	Cdh23	282
Myog	Acvr2b	282
Myog	Actn3	282
Cyp2e1	Ar	282
Rps6ka1	Etv4	281
Mapk4	Klf9	281
Irf8	Bcl3	281
Ikzf1	Cd86	281
Hivep2	Clic5	281
Fosl2	Cd3e	281
Esrra	Aes	281
Trp53	Car2	280
Runx3	Gsdma	280
Pkib	Irf8	280
Nfkb2	Casp6	280
Myom2	Myog	280
Esrra	Abca1	280
Trp53	Pfkfb2	279
Sgk3	E2f2	279
Rps6ka4	E2f2	279
Ptprc	Ar	279
Myog	Ccne1	279
Klf9	Cdc6	279
Klf12	Ankrd66	279
Irf8	Cxcl13	279
Ddit3	B4galnt1	279
Cers6	Atp13a5	279
Cers6	Atp13a3	279
Wdhd1	Arhgap11a	278
Trp53	Egln1	278
Pitx2	Gmds	278
Pde4b	Nr3c2	278
Nfkb2	Lpxn	278
Ncapg2	E2f2	278
Heyl	Camk2a	278
Hacd4	Cers6	278
Esrrg	Cpt1b	278
E2f2	Asf1b	278
Camk2a	Bhlhe41	278
Ar	Apoe	278
Trp53	Kif23	277
Trp53	Fam129b	277
Tlr7	Ikzf1	277
Tead4	LOC108167344	277
Rgs14	Cux2	277
Rgs10	Cux2	277
Prrx2	Map2k6	277
Fosl2	Flt3	277
E2f2	Csk	277
Zfp827	Mapk4	276
Thra	Aes	276
Rcor2	Gapdh	276
Nfkb2	Ccne1	276
Hmgb2	Actr2	276
Zfp827	Fbxl19	275
Zfp691	Fbxl19	275
Zfp691	Dnajb5	275
Zbtb16	Fbxl19	275
Trp53	Ripk3	275
Trp53	Cd7	275
Tfec	Bak1	275
Tcf23	Frzb	275
Tbx2	Cd3d	275
Stat4	Ccr5	275
Prc1	E2f2	275
Osr1	Fbxl19	275
Nfkb2	Ccnf	275
Nfkb2	Birc5	275
Nfkb2	Bak1	275
Lpxn	Irf8	275
Klf9	Fbxl19	275
Klf12	Fbxl19	275
Klf11	Fbxl19	275
Ikzf1	Fbxl19	275
Hivep2	Fbxl19	275
Hivep2	Coq10a	275
Gm13212	Fbxl19	275
Glis3	Fbxl19	275
Fosl2	Dusp28	275
Fosl2	Dusp23	275
Fosl2	Cdkn3	275
Fosl2	Cdc14a	275
Fbxl19	2610305D13Rik	275
Vdr	Hpgds	274
Thra	Pdia3	274
Stat4	Plcg2	274
Spib	C1qa	274
Sod3	Cers6	274
Prrx2	Efemp2	274
Mavs	Irf8	274
Lyl1	Aes	274
Hmgb2	Depdc1b	274
Thra	Cdk1	273
Tfec	Rps6ka1	273
Slc25a4	Esrra	273
Runx3	Notch2	273
Plekha6	Etv4	273
Nfkb2	Dll4	273
Mxd3	Bub1	273
Klf11	Ccng1	273
Ikzf1	Cd3e	273
Vdr	Melk	272
Thra	Melk	272
Tcf23	Pde7a	272
Tcf23	Ddo	272
Tcf23	Aes	272
Skp2	Nfkb2	272
Rxrg	Melk	272
Pitx2	Adsl	272
Nr3c2	Melk	272
Melk	Esrrg	272
Melk	Esrra	272
Melk	Ar	272
Wdhd1	Ccne1	271
Trp53	Mmp23	271
Trerf1	Cnpy3	271
Spib	Cd37	271
Slc7a2	Esrrg	271
Pptc7	Nfkb2	271
Ppm1k	Nfkb2	271
Ppm1e	Nfkb2	271
Nfkb2	Lrig1	271
Wdhd1	Plk1	270
Tcf23	Pdhx	270
Stat4	Il11	270
Optn	Glis3	270
Nfkb2	Melk	270
Bhlhe41	Asph	270
Zfp30	Mapk4	269
Ybx2	Scara5	269
Svil	Ar	269
Spib	Pdhx	269
Pitx2	Optn	269
Ndufv1	Esrra	269
Marveld2	Cux2	269
Mapk4	Bcl11a	269
Hmgb2	Cep192	269
Wisp2	Trp53	268
Tlr9	Ikzf1	268
Tcf23	Lyz2	268
Nfkb2	Myl4	268
Ddit3	Cdk1	268
Zbtb10	Tead4	267
Vsir	Lyl1	267
Trp53	Bmp3	267
Trerf1	Eif4a1	267
Trem2	Irf8	267
Tnnt3	Myog	267
Tm7sf2	Spib	267
Stat4	Lifr	267
Stat4	Irs1	267
Rps6ka2	Ar	267
Mxd3	Ccnf	267
Deb1	Cers6	267
Cers6	Acacb	267
Trp53	Tlr7	266
Trp53	Ncf1	266
Trp53	Map1b	266
Tlr7	Hmgb2	266
Thra	Mapk4	266
Sgk3	Rxrg	266
Pptc7	Klf9	266
Ppm1k	Hivep2	266
Nfkb2	Ephb2	266
Wdhd1	Cdkn3	265
Trp53	Cks2	265
Trp53	Alox5	265
Trp53	Abcb9	265
Tnfrsf1a	Cebpb	265
Tlr8	Nfkb2	265
Thra	Me3	265
Thra	Galk2	265
Stat4	Ccnf	265
Ybx2	Nudt7	264
Vdr	Tnnt1	264
Tspo	Trp53	264
Thra	Abca1	264
Rxrg	Cpt1b	264
Nr3c2	Hpgds	264
Myog	Eno3	264
Mxd3	Dlgap5	264
Mxd3	Cep55	264
Lyl1	Alox5ap	264
Fabp3	Esrra	264
Cd82	Ar	264
Bcl11a	Actr3b	264
Zfp827	Nrip3	263
Tst	Tcf23	263
Trp53	Ptgis	263
Trp53	Edn3	263
Thra	Aldoa	263
Stat4	Casp8	263
Ppm1e	Bcl11a	263
Nek2	Ikzf1	263
Mxd3	Depdc1a	263
Ikzf1	Csk	263
Zbtb16	Txnip	262
Zbtb16	Csf1r	262
Zbtb16	Ccna2	262
Trp53	Irak4	262
Tfec	Baz1a	262
Srl	Rxrg	262
Spic	Sash3	262
Nrip3	Hivep2	262
Nme4	Hmgb2	262
Mlxipl	Lpin1	262
Irf8	Arhgap4	262
Ikzf1	Adcy7	262
Dll4	Ar	262
Zbtb16	Adcy6	261
Tcf23	Myl1	261
Spic	Nckap1l	261
Nr3c2	Fhl2	261
Ikzf1	Ccng1	261
E2f2	Casp8	261
Wdhd1	Dclk1	260
Wdhd1	Brca1	260
Trp53	Tnfrsf1b	260
Trp53	Mpz	260
Trerf1	Rmdn1	260
Timp3	Stat4	260
Pycard	Irf8	260
Pitx2	Pcsk6	260
Mylpf	Gata2	260
Myl10	Gata2	260
Hmgb2	Dtl	260
Gm13212	Cdc6	260
Epas1	Ddit3	260
Bcl3	Bcl11a	260
Zwilch	Mxd3	259
Tmeff1	Snai3	259
Tlr8	Hmgb2	259
Tgfb1	Nfkb2	259
Tec	Fosl2	259
Tcf23	Decr1	259
Stat4	Ccna2	259
Rbbp8	Nfkb2	259
Pdia3	Nfkb2	259
Notch2	Cux2	259
Mmp24	Fosl2	259
Mmp24	Etv4	259
Lyl1	Gpr183	259
Kif22	E2f2	259
Fosl2	Csk	259
Zbtb16	Ccng1	258
Vdr	Map2k6	258
Stat4	Il15	258
Ptprc	Lyl1	258
Pitx2	Chodl	258
Nfkb2	Cd82	258
Mrc1	Irf8	258
Heyl	Asb15	258
Zbtb16	Tnnt1	257
Wdhd1	Spc25	257
Tfec	Sgk3	257
Tfec	Rps6ka4	257
Tfec	Rps6ka2	257
Tcf23	Myl4	257
Tbx15	Myoz1	257
Spic	Ripk3	257
Map3k15	Klf11	257
Esrra	Dhrs7c	257
Wdhd1	Cenpu	256
Tgfb1	Runx3	256
Tgfb1	Myog	256
Tec	E2f2	256
Sod2	Ar	256
Sirt3	E2f2	256
Runx3	Slc30a7	256
Mxd3	Ccnb2	256
Mapk4	Esrra	256
Map2k6	Ar	256
Klf9	Actr3b	256
Kif20a	E2f2	256
Ikzf1	Cdc6	256
Hmgb2	Gins2	256
Gata2	Epas1	256
Gata2	Baz1a	256
Wdhd1	Mis18bp1	255
Wdhd1	BC030867	255
Tlr4	Ikzf1	255
Tgif1	Ppp2r3a	255
Rxrg	Mapk4	255
Nfkb2	Myl1	255
Mapk4	Cebpa	255
Cdc6	2610305D13Rik	255
Zbtb16	Ptprc	254
Wt1	Irf8	254
Wdhd1	Ckap2l	254
Vdr	Slc11a1	254
Trp53	Maged1	254
Trp53	Acpp	254
Traf1	Irf8	254
Top2a	Mxd3	254
Thra	Decr1	254
Tcfl5	Has1	254
Tcf23	Pdlim5	254
Spic	Apaf1	254
Scx	Aes	254
Pdia3	Nr3c2	254
Nrg1	Etv4	254
Notch2	Fosl2	254
Nfkb2	Ccna2	254
Myog	Itga7	254
Gata2	Fut4	254
Fosl2	Ccnb1	254
Chek1	Ar	254
Zfp827	Zbtb10	253
Zbtb16	Mylk4	253
Vdr	Hsp90b1	253
Trp53	Naip5	253
Trp53	2810417H13Rik	253
Rad51	Nfkb2	253
Notch2	Klf12	253
Nfkb2	Apaf1	253
Klf9	Gapdh	253
Klf11	Ankrd66	253
Inha	Ar	253
Zbtb16	Insr	252
Wdhd1	Neil3	252
Wdhd1	Kifc1	252
Trp53	Nek2	252
Trp53	Kif2c	252
Tead4	Magix	252
Pitx2	Axin2	252
Lpl	Esrrg	252
Incenp	E2f2	252
Hmgb2	Cdkn3	252
Gm13212	Bmp2k	252
Esrra	Crat	252
Tro	E2f2	251
Tlr9	Stat4	251
Timp3	Fosl2	251
Thra	Dhrs7c	251
Rcor2	Dpf3	251
Rasd2	Etv4	251
Rap2b	Etv4	251
Ppp4c	2610305D13Rik	251
Pdia5	Nfkb2	251
P4hb	Nfkb2	251
Maged1	E2f2	251
Kif20b	E2f2	251
Grip2	Esrrg	251
Wt1	Pitx2	250
Trp53	Lpl	250
Trp53	Cdca8	250
Stat4	Pltp	250
Rxrg	Map2k6	250
Rnasel	Irf8	250
Rmdn1	Ddit3	250
Osr1	Notch2	250
Nfkb2	Espl1	250
Myog	Map2k6	250
Myog	Il16	250
Myog	Grip2	250
Mlxipl	Apoe	250
Klf11	Asb12	250
Irf8	H2-DMb1	250
Ikzf1	Arhgap15	250
Id2	Cd86	250
Ddit3	Ccne1	250
Cebpa	Ccne1	250
Vdr	Acvr2b	249
Trp53	Dot1l	249
Tns1	Thra	249
Fhl2	Esrra	249
Zfp691	Mapk4	248
Zbtb16	Mapk4	248
Vdr	Lpl	248
Unc13d	Bhlhe41	248
Trp53	Sod3	248
Trp53	Myl1	248
Tlr9	Hmgb2	248
Stat4	Bak1	248
Spib	Lrmp	248
Scube2	Nfkb2	248
Rxrg	Fhl2	248
Ppp4c	Gm13212	248
Osr1	Mapk4	248
Nfkb2	Cd86	248
Ncam1	Id2	248
Mxd3	Mcm3	248
Mapk4	Klf12	248
Mapk4	Klf11	248
Mapk4	Ikzf1	248
Mapk4	Gm13212	248
Mapk4	Glis3	248
Mapk4	2610305D13Rik	248
Lyl1	Hcst	248
Klf11	Cdc20	248
Ikzf1	Csf2ra	248
Fosl2	Cd3d	248
Etv4	Slc30a7	248
Esrrg	Aes	248
E2f2	Bard1	248
Csf2ra	Cebpa	248
Cebpa	Apoe	248
Zfp691	Notch2	247
Txn1	Nr3c2	247
Trp53	Prss46	247
Trp53	Prss12	247
Trp53	Pamr1	247
Plk1	Ar	247
Notch2	Klf9	247
Mxd3	2810417H13Rik	247
Map3k15	Klf12	247
Kif15	Hmgb2	247
Gapdh	Bcl11a	247
Fosl2	Ccnb2	247
Esrrg	Aldoa	247
Wdhd1	Spc24	246
Trp53	Dnmt3l	246
Trp53	Dll4	246
Trp53	Bsg	246
Tead4	Herc3	246
Tcf23	Inpp5d	246
Spn	Spib	246
Sgk3	Myog	246
Sgk3	Fosl2	246
Sfrp1	Pitx2	246
Rps6ka1	Nr3c2	246
Pltp	Mlxipl	246
Nfkb2	Fancd2	246
Myog	Atp2a2	246
Mxd3	Mcm5	246
Insr	Fosl2	246
Cdc6	Ar	246
Ybx2	Sod2	245
Wdhd1	Kif20a	245
Wdhd1	Hpgds	245
Vdr	Tnnt2	245
Trp53	Cyba	245
Trp53	Ciita	245
Tpi1	Scx	245
Tnfrsf1a	Irf8	245
Tlr4	Ddit3	245
Thra	Syk	245
Sod2	Esrra	245
Rad51	Mxd3	245
Myog	Capn3	245
Lyl1	Csf1r	245
Irf8	Cxcr6	245
Il11	Cebpa	245
Hmgb2	Cd180	245
Hivep2	Dclk1	245
Frat1	2610305D13Rik	245
Esrra	Aldoa	245
Trp53	Sfrp2	244
Tlr7	Spib	244
Thra	Prkca	244
Stk36	Glis3	244
Spib	Gapdh	244
Plcg2	Lyl1	244
Myog	Igfbp4	244
Mxd3	Cdk1	244
Klf9	Bmp2k	244
Klf12	Kifc1	244
Id2	Chpt1	244
Hsp90b1	Esrrg	244
Hsp90b1	Esrra	244
Elovl1	Cers6	244
Zfp827	Obscn	243
Zfp827	Ank2	243
Wt1	Tead4	243
Trp53	Hrc	243
Trp53	Gys1	243
Trp53	Clcn1	243
Trp53	Blnk	243
Thra	Grip2	243
Tfec	Ly86	243
Snai3	Flt3	243
Snai3	Csf1r	243
Slc37a2	Cers6	243
Rxrg	Crat	243
Rps6ka4	Fosl2	243
Nme7	Hmgb2	243
Myog	Cd48	243
Mgst1	Ar	243
Irf8	Irak4	243
Igfbp4	Ar	243
Gata2	Apaf1	243
Flt3	Ar	243
Zfp827	Bmp2k	242
Zfp691	Bmp2k	242
Zfp30	Bmp2k	242
Zbtb16	Fut4	242
Zbtb16	Bmp2k	242
Vdr	Abca1	242
Thra	P4hb	242
Tcf23	Abcg1	242
Spib	Clec2i	242
Rxrg	Grip2	242
Rps6ka4	Myog	242
Osr1	Nrip3	242
Osr1	Bmp2k	242
Nr3c2	Atp5j	242
Mxd3	Cdkn3	242
Klf12	Bmp2k	242
Klf11	Bmp2k	242
Irf8	Cd209a	242
Ikzf1	Bmp2k	242
Hivep2	Bmp2k	242
Glis3	Bmp2k	242
E2f2	Cdca8	242
E2f2	Bub1	242
Bmp2k	Bcl11a	242
Bmp2k	2610305D13Rik	242
Wdhd1	Ckap2	241
Trp53	Igfbp6	241
Trp53	Has1	241
Tnc	Scx	241
Tfec	Tec	241
Tfec	Csk	241
Syk	Rxrg	241
Syk	Nr3c2	241
Syk	Esrrg	241
Syk	Esrra	241
Ptprc	Bcl11a	241
Osr1	Dclk1	241
Myh11	Ar	241
Lyl1	Arhgap4	241
Klf12	Cdc6	241
Heyl	Gapdh	241
Ghr	Ar	241
Crat	Ar	241
Zfp827	Notch2	240
Zfp30	Notch2	240
Txnip	Klf9	240
Trp53	Plcg2	240
Tlr4	Cebpa	240
Tead4	Ccnb1	240
Rxrg	Rasd2	240
Pitx2	Baz1a	240
Pdk2	Nr3c2	240
Nr3c2	Me3	240
Notch2	Klf11	240
Notch2	Hivep2	240
Notch2	Gm13212	240
Notch2	Glis3	240
Notch2	2610305D13Rik	240
Lyl1	Chpt1	240
Hmgb2	Ephb2	240
Hmgb2	Ccnf	240
Heyl	Ankrd1	240
Gata2	Alas1	240
Car9	Ar	240
Trp53	Cep55	239
Tmem52	Glis3	239
Tlr7	Stat4	239
Tcf23	Ppl	239
Stat4	Irak4	239
Spib	Klk1	239
Sox7	Kank3	239
Pitx2	Eya1	239
Nfkb2	Lipa	239
Nfkb2	Cdc6	239
Mxd3	Mis18bp1	239
Ikzf1	Cdk1	239
Etv4	Camk2a	239
Esrra	Atp5j	239
Cers6	Apip	239
Ybx2	Eif1a	238
Wdr34	Klf12	238
Vdr	Cdk1	238
Vcam1	Nfkb2	238
Trp53	Havcr1	238
Trp53	Cd3e	238
Tnfrsf1a	Thra	238
Tgfb1	Cebpa	238
Tcf23	Gusb	238
Spic	Cd53	238
Runx3	Aes	238
Pck1	Ddit3	238
Mlxipl	Acss2	238
Irf8	Il4ra	238
Hpgds	Cebpa	238
Greb1	Esrra	238
Gata2	Ephb2	238
Foxn3	Fhl2	238
Esrrg	Apbb3	238
Decr1	Cebpa	238
Zfp827	Actr2	237
Zbtb16	Pptc7	237
Zbtb16	Obscn	237
Wdhd1	Depdc1a	237
Vdr	Dhrs7c	237
Vdr	Aes	237
Trp53	Rassf5	237
Thra	Cpt1b	237
Tead4	Ppif	237
Tead4	Ppia	237
Slc27a1	Mlxipl	237
Ripk3	Hmgb2	237
Rhbdl1	Id2	237
Ptprc	Osr1	237
Prrx2	Ankrd1	237
Nr3c2	Dhrs7c	237
Nr3c2	Aldoa	237
Ndufb5	Esrra	237
Ikzf1	Cd3d	237
Glis3	Dgkb	237
Esrrg	Dhrs7c	237
Dhrs7c	Ar	237
Zeb2	Epas1	236
Ybx2	Ppil1	236
Vdac1	Trp53	236
Stat4	Insr	236
Rps6ka2	Cers6	236
Rps6ka1	Cers6	236
Rasgrp2	Ikzf1	236
Prr11	Mxd3	236
Ppp1r14b	Nfkb2	236
Podnl1	Osr1	236
Pitpnc1	Hivep2	236
Nfkb2	Ccnb2	236
Myog	Clcn1	236
Myo1f	Lyl1	236
Esrrg	Crat	236
Ar	Abcg1	236
Ybx2	Gapdh	235
Trp53	Tril	235
Trp53	S100a11	235
Trerf1	Insr	235
Tnnt1	Nr3c2	235
Tcf23	Sema4a	235
Sox7	Gapdh	235
Sod3	Nr3c2	235
Sod3	Esrra	235
Snai3	Pcdhgc3	235
Snai3	Pcdh12	235
Snai3	Cdh16	235
Snai3	Cdh11	235
Sgk3	Cers6	235
Rxrg	Rps6ka4	235
Rxrg	Aes	235
Rps6ka4	Cers6	235
Prrx2	Loxl1	235
Prkca	Myog	235
Pitpnc1	Klf11	235
Nr3c2	Mapk4	235
Nr3c2	Aes	235
Nfkb2	Dusp2	235
Nfkb2	Ccnb1	235
Mxd3	Kif23	235
Gm13212	Ccnb1	235
Zfp30	Ephb2	234
Wdhd1	Stil	234
Trp53	Podnl1	234
Trp53	Lrrc52	234
Trp53	Lrrc39	234
Trp53	Lrrc24	234
Trp53	Fcgr3	234
Trp53	Ecm2	234
Trp53	Adgra2	234
Tlr4	Fosl2	234
Tfec	Syk	234
Tfec	Cybb	234
Syk	Gata2	234
Stat4	Ccnb2	234
Stat4	Ccnb1	234
Pros1	Nfkb2	234
Pak4	Ar	234
Nr3c2	Grip2	234
Melk	E2f2	234
Lrrc52	Klf12	234
Hmgb2	Bard1	234
Ar	Apaf1	234
Tnfrsf1a	Rxrg	233
Tlr5	Hmgb2	233
Thra	Apbb3	233
Spic	Myo1g	233
Spib	H2-Oa	233
Sirt5	Nr3c2	233
Plcg2	Bcl11a	233
Pdlim5	Gata2	233
Nfkb2	Cd48	233
[truncated: 4,193 more rows]
